# Supplementary material for: Effect of Acetazolamide on Postural Control in Patients with COPD Travelling to 3100 m Randomized Trial
Source: J Clin Med. 2023 Feb 4;12(4):1246. doi: 10.3390/jcm12041246 (PMC9960941; doi:10.3390/jcm12041246)
Supplement: Supplementary file 1 [file jcm-12-01246-s001.zip › jcm-2043652-supplementary.pdf]

**Supplementary Table S1. Per-protocol analysis**

|                   | Placebo       |                 | Acetazolamide |                | Difference in<br>altitude-induced<br>changes between<br>groups |
|-------------------|---------------|-----------------|---------------|----------------|----------------------------------------------------------------|
|                   | 760 m         | 3100 m          | 760 m         | 3100 m         |                                                                |
| COPL, cm          | 28.06 ± 11.17 | 29.34 ± 11.17 * | 27.35 ± 8.7   | 28.34 ± 8.7 *  | 0.48 [-1.17 to 2.13]                                           |
| AP amplitude, cm  | 2.26 ± 0.93   | 2.17 ± 0.93     | 2.12 ± 0.73   | 2.47 ± 0.73 ** | 0.27 [ 0.07 to 0.48] ##                                        |
| AP velocity, cm/s | 0.69 ± 0.31   | 0.75 ± 0.31 **  | 0.68 ± 0.24   | 0.74 ± 0.24 ** | 0.02 [-0.02 to 0.07]                                           |
| ML amplitude, cm  | 1.62 ± 0.72   | 1.47 ± 0.72 *   | 1.48 ± 0.56   | 1.48 ± 0.56    | 0.09 [-0.08 to 0.26]                                           |

Values are presented as mean ± SD and mean differences with 95% confidence intervals, n=90; \*p <0.05 / \*\*p <0.01 vs. baseline without drug, ##p <0.01 change with acetazolamide vs. change with placebo.

Differences and their p values are adjusted for age, sex, height, weight, baseline values of PC measurements, FEV1 at 760m, smoking and AMSc-score.

COPL = center of pressure path length; AP = antero-posterior; ML = medio-lateral
